# Supplementary material
Source: Springer Nature journal article supplement (https://mijn.bsl.nl/resource/supplementary/13047_2011_484_MOESM2_ESM.pdf/7473920)

Custom-made functional insole

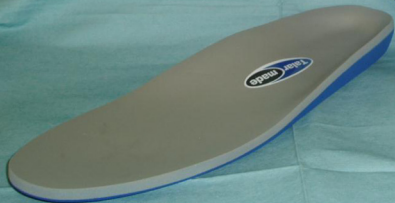

Prefabricated insole

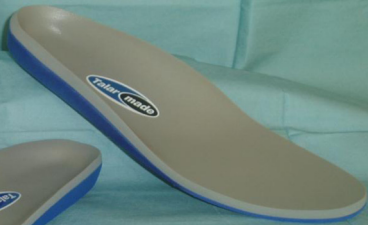

Supplement: MOESM2 [file 7473920]
